# Supplementary material for: Ultra-Fine Ruthenium Oxide Quantum Dots/Reduced Graphene Oxide Composite as Electrodes for High-Performance Supercapacitors
Source: MDPI journal article supplement (doi:10.3390/nano12071210), 2022-04-04
Supplement: s1 [file s1]

Supporting Information

# Ultra-Fine Ruthenium Oxide Quantum Dots/Reduced Graphene Oxide Composite as Electrodes for High-Performance Supercapacitors

Jie Zhao <sup>1</sup>, Jianmin Zhang <sup>2,\*</sup>, Hang Yin <sup>1</sup>, Yuling Zhao <sup>3</sup>, Guangxu Xu <sup>1</sup>, Jinshi Yuan <sup>1</sup>, Xiaoyao Mo <sup>1</sup>, Jie Tang <sup>4,\*</sup> and Fengyun Wang <sup>1,3\*</sup>

<sup>1</sup> College of Physics, Qingdao University, No. 308 Ningxia Road, Qingdao 266071, China; zj120513@163.com (J.Z.); hangyinccc@gmail.com (H.Y.); tsuixgx1218@163.com (G.X.); yuanjinshi@foxmail.com (J.Y.); mxyphysics@163.com (X.M.)

<sup>2</sup> National Engineering Research Center for Intelligent Electrical Vehicle Power System, College of Mechanical and Electrical Engineering, Qingdao University, No. 308 Ningxia Road, Qingdao 266071, China

<sup>3</sup> State Key Laboratory of Bio Fibers and Eco Textiles, Qingdao University, No. 308 Ningxia Road, Qingdao 266071, China; zhaoyuling@qdu.edu.cn

<sup>4</sup> National Institute for Materials Science, 1-2-1 Sengen, Tsukuba 3050047, Japan

\* Correspondence: zhangjm@qdu.edu.cn (J.Z.); tang.jie@nims.go.jp (J.T.); fywang@qdu.edu.cn (F.W.)

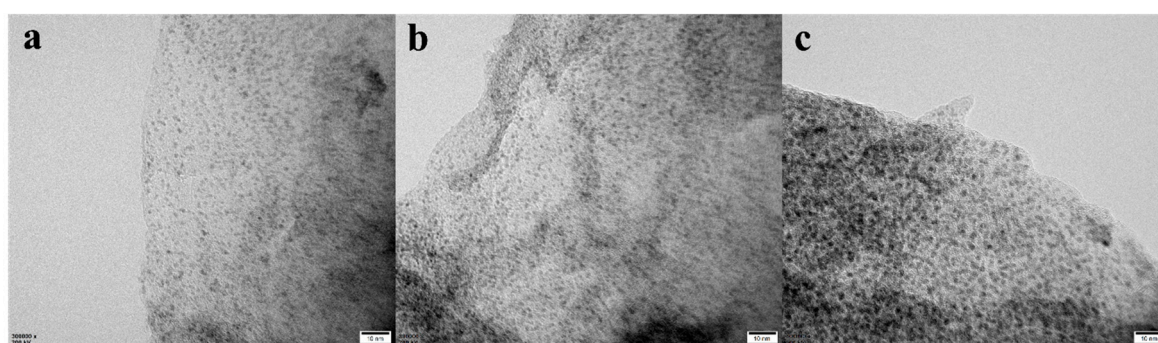

Figure S1. High magnification TEM images of (a) RG-1, (b) RG-2, (c) RG-3.

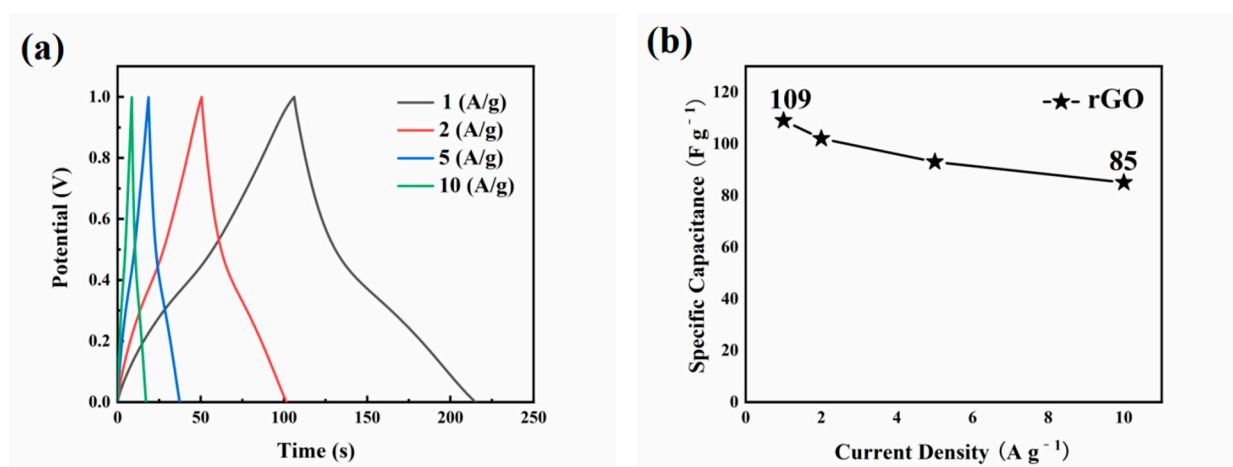

Figure S2. (a) charge and discharge curves of rGO. (b) Rate performance of rGO.

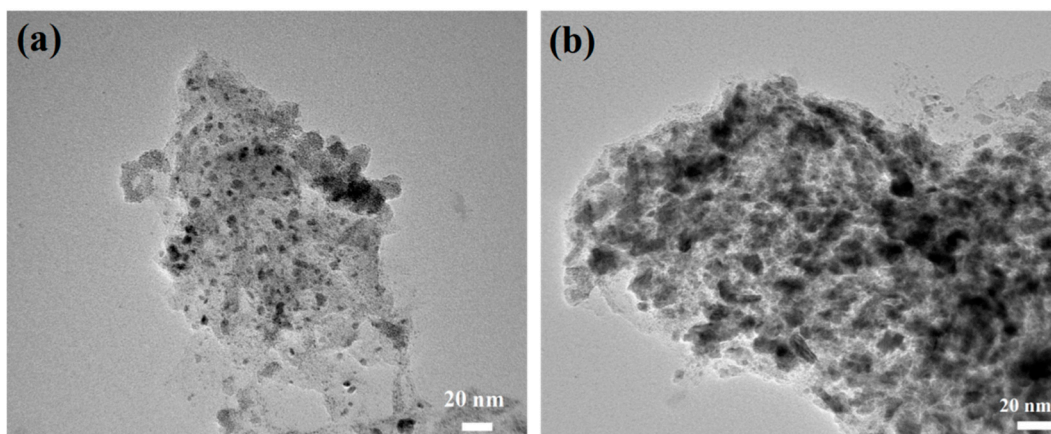

**Figure S3.** (a,b) TEM images of RG with the ruthenium content of 120 mg at different magnification.
